# Supplementary material for: A seasonal algorithm of the snow-covered area fraction formountainous terrain
Source: Copernicus journal article supplement (doi:10.5194/tc-2020-377), 2021-01-05
Supplement: Supplementary file [file tc-2020-377-AC2-supplement.pdf]

We thank the reviewer# 2 for the review and the comments. All comments (in italics) are addressed below (in bold).

### **General comments**

*I found the evaluations of the algorithm generally convincing. The authors make use of a variety of evaluation data in order to assess the algorithm over a broad range of spatial and temporal scales and across a range of elevations. However the details of the algorithm implementation are not described clearly enough for the reader to follow. Furthermore, it's unclear whether the performance of the topographic algorithm is an improvement on existing algorithms that have been used to model fSCA in mountain regions. Both of these issues should be addressed prior to publication.*

**Thank you very much for your comments and for pointing out the main two issues. We rewrote the description of the algorithm and also included two figures to more clearly explain how it works. Additionally, we now also include a comparison with the fSCA algorithm of Swenson and Lawrence (2012) as benchmark fSCA model, as described in the technical description of the Community Land Surface model (CLM, version 5) (Lawrence et al., 2018). Please see our detailed answers on both issues below.**

***mountainous vs flat terrain** Please be clear about whether you expect this algorithm to be applicable to nonmountainous regions (in the introduction and reiterate in discussions/conclusions) or whether it will be possible to merge it with other "flat" algorithms to make a global fSCA algorithm (I'm not sure to what extent equation 3 + equation 1 represents what is typically used in models over flat terrain). Do you anticipate that sub-grid topographic parameters could be computed globally for every model grid cell and the parametrization used for flat grid cells as well? If so, does the expression for sigma\_topo reduce to the "flat" sigma formula for perfectly flat terrain? If not, please state that you expect this algorithm as presently implemented is intended only to be used in simulations over mountainous terrain and it would require modification to implement it in a global climate model.*

**We completely rewrote the description of the fSCA algorithm and also added two new figures for illustration and better understanding of our algorithm. As both the formulations for the standard deviation of snow depth were originally derived using data from mountainous areas, the labeling of the two with 'topo' and 'flat' in the original manuscript was somewhat misleading. We now changed the naming to the corresponding authors ('Helbig', 'Egli'), and more clearly describe the reasoning for using these two formulations.**

**Coarse grid cells with a subgrid mean slope angle of zero are rare. For Switzerland we only obtain a percentage of 0.01 %. Therefore, we could not re-**

liably evaluate the performance of our algorithm for a flat grid cell. We suggest to use  $\sigma_{HS}^{\text{Egli}}$  instead of  $\sigma_{HS}^{\text{Helbig}}$  for a completely flat grid cell to avoid  $fSCA = 1$  for a subgrid mean slope angle of zero (cf. Eq. (5)). However, for a global application of our algorithm any closed-form  $fSCA$  parameterization could be applied in our algorithm for a flat grid cell. We now mention that in the discussion.

*Your results comparing with ALS/ADS/camera/Sentinel data are well presented, but I would like to compare them with the typical performance of previous  $fSCA$  algorithms that have been applied in mountainous terrain. This may only require showing an extra row in your tables for how the “flat” parametrization (equation 3 only) performs relative to your combined eq 2+3, or a summary figure contrasting their performance. However, if there are other more standard parametrizations that have been used in mountain regions please consider demonstrating whether your algorithm is an improvement on those as well.*

To perform a model intercomparison, we implemented the two closed-form parameterizations from Swenson and Lawrence (2012) as benchmark  $fSCA$  model as described in the technical description of the Community Land Surface model (CLM5.0) (Lawrence et al., 2018). An evaluation of modelled  $fSCA$  on our daily data sets showed that our  $fSCA$  algorithm captures the seasonal evolution better than the CLM5.0 algorithm (cf. Table 3, 4, 5 and Figure 4, 5, 8 and 9).

*algorithm description Section 2.4 (lines 110-123). This section only provides the reader with the most basic outline of how the algorithm works. I think this section needs to be broadened in particular with regards to how the seasonal and snow event aspects of the algorithm work together. A cartoon/schematic figure which illustrates several key decisions made within a two week window of time-varying  $HS$  and how those decisions affect the “seasonal” and “nsnow” curves would be extremely helpful. Ideally this schematic would highlight the differences between  $fSCA_{\text{season}}$ ,  $fSCA_{\text{curr}}$ , and the full  $fSCA$  algorithm. At present I have no idea what the difference is between  $JIM_{\text{season}}$  and  $JIM_{\text{curr}}$  output because the point of the  $HS$  tracking has not been clearly communicated. For example, I don’t understand how switching off new snow updates differs from performing no  $HS$  tracking? (line 143)*

We completely rewrote the description of the  $fSCA$  algorithm and also added two new figures for illustration as suggested (new Figure 1 and 2). A new Table 1 gives an overview over the various  $fSCA$  model simplifications in  $JIM_{\text{OSHD}}$  and the CLM5.0 benchmark  $fSCA$  model as well as how they differ from our algorithm.

*Appendix The pseudocode and text currently provided in the appendix aren’t clear enough to communicate the implementation of the algorithm. If you intend to publish the*

*complete algorithm (see the request to clarify this below), I would suggest you focus on providing a full description of the concepts/decision-making that it uses rather than pseudocode. The main text should communicate a basic understanding of how the algorithm operates (this is not the case presently), with further details deferred to the appendix, if you wish. While I think it would be helpful to provide a clearer version of the pseudocode along with the published algorithm (since the algorithm will presumably be provided in a specific computer language), I'm not sure it needs to be included in the paper if the rest of the description is sufficient. Please provide definitions for all terms. E.g. what does "recent" mean? What does "current" mean? Does recent snow = current snow? The treatment of melting (which I presume is tracked to remove the flat snow layer before reverting to the underlying topography-dependent layer) is unclear. The reason for tracking HS differences is never fully articulated. Again, I think that some sort of visual depiction/description of what's going on would be extremely valuable.*

**As outlined above, we completely rewrote the description of the *fSCA* algorithm and also added two new figures for illustration (new Figure 1 and 2). For instance, Figure 1 shows all terms in context. With the new description of the algorithm and the new figures, we didn't see the need for pseudo-code anymore. Furthermore, we published the algorithm code on a gitlab repository and linked it to EnviDat, an environmental data portal.**

### **Specific comments**

*Line 50: You introduce the idea of hysteresis here, but don't explicitly state that your algorithm includes it until Section 2. I think it's worth mentioning in the paper description at lines 62-73.*

**Thanks, we now mention this in the paper description.**

*Why was 2 weeks chosen as the period to track new snow and melted snow over? This may only cover 1 synoptic scale event – is that sufficient?*

**Testing of the algorithm showed that a two week window provided reliable simulations results of *fSCA*. However, this is still an ad-hoc decision which might indeed require further investigation once we know more about changes in snow depth distributions after snowfall. We now mention this in the algorithm description in the manuscript.**

*I realize you are using the "flat" parametrization to approximate a uniform blanketing of new snow, however the scatter at low elevations (fig 8) suggests that there may be better alternatives (although I'm not sure what level of agreement can be expected between modelled and observed *fSCA* at such elevations – a comment on this would be useful).*

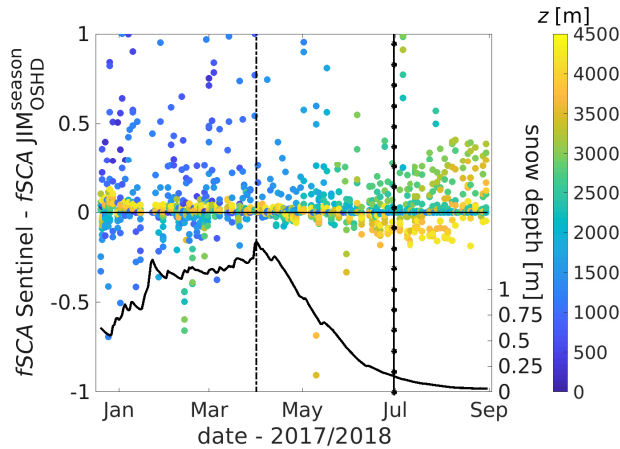

Figure 1: Sentinel-derived  $fSCA$  minus modelled  $fSCA$  without any  $fSCA_{nsnow}$  ( $JIM_{OSHD}^{\text{season}}$ ) for Switzerland as a function of date and elevation  $z$  for available satellite dates.

Most of the scatter in Figure 9 (formerly Fig. 8) is actually tied to low  $HS$  at lower elevations or along the snow line. This may point to problems with the  $fSCA_{nsnow}$  in our algorithm. However, the scatter remains when we neglect  $fSCA_{nsnow}$  and only compute  $fSCA_{\text{season}}$  using  $\sigma_{HS}^{\text{Helbig}}$  via Eq. (2)-(3) (Figure 1), suggesting that  $fSCA_{nsnow}$  is not the main reason for this scatter.

We therefore assume that most of the  $fSCA$  scatter at low elevations (Figure 9) originates from modelled  $HS$  errors when snow falls on bare ground, i.e. early in the season or at the snow line. As discussed in Section 5.2.3, removing grid cells with  $HS < 5$  cm improved the performance statistics considerably. In order to focus on the performance evaluation of our  $fSCA$  algorithm, ideally we should minimize seasonal snow cover model or measurement uncertainties. Therefore, we now also removed modelled  $HS$  lower than 5 cm during pre-processing of the model data (Section 3.1). This reduced the scatter in Figure 8a (cf. new Figure 9a in the manuscript) and improved overall performance measures (Table 4,5).

*Please confirm:  $HS=HS(X,t)$ , where  $X$  is the location on the coarse model grid (with grid size,  $L$  from eq 2) and  $t$  is the time (day of the year, for example). Likewise in equations 2 and 3 the  $HS$  variables based on the temporally and spatially varying values of  $HS$  from the model (hence one could substitute eqs 2 and 3 into eq 1 and simplify to get two forms of eq 1) – is that correct?*

**Your description is correct. We now present the three  $fSCA$  ( $fSCA_{\text{season}}$ ,  $fSCA_{\text{nsnow}}^{\text{recent}}$  and  $fSCA_{\text{nsnow}}^{\text{14day}}$ ) as suggested (cf. Eq. (5)-(7)).**

*Fig 1: By "reset"  $fSCA_{season}$  do you mean that you assign the  $fSCA_{nsnow}$  value to  $fSCA_{season}$ ?*

**The description was unclear. We meant to say that  $fSCA_{nsnow}$  is set to zero and  $fSCA_{season}$  is recalculated using a newly estimated seasonal  $HS_{max}$ . However, this reset function was removed in order to simplify the algorithm. All model results were recalculated accordingly.**

*Figure 3+4: the colors of the "red and blue stars" appear close to orange and purple to me – especially if the page is zoomed out. Can you adjust the colors or the text to be slightly more in line with each other? Adjusting the red stars closer to orange may actually be more helpful since it would further distinguish it from the red circles of the model output data.*

**Changed as suggested.**

*Line 327: Your argument isn't 100% clear here – isn't it an easy comparison to provide results using only  $\sigma_{topo}$  and to explicitly see if the flat parametrization of new snow events is helpful?*

**Thank you for the suggestion. We made an additional model run for the winter season 2017/18 to evaluate model performance with Sentinel-derived  $fSCA$  only using  $\sigma_{HS}^{Helbig}$  to derive  $fSCA$  ( $JIM_{OSHD}^{allHelbig}$ ). Model performance was similar. Thus, while applying  $\sigma_{dHS}^{Egli}$  might not describe the true spatial new snow distribution in mountainous terrain, it is a first approach. Furthermore,  $\sigma_{dHS}^{Egli}$  is required for flat grid cells, where  $\sigma_{HS}^{Helbig}$  is always 1. We now mention these points at the beginning of the discussion (Section 5.1).**

*Line 350: Rephrase. It's unclear what you mean by "modelled  $fSCA$  does not show similar strong trends when compared to Sentinel-derived  $fSCA$ ..."*

**Thanks, we rephrased that.**

*Line 386: do you mean "versus Table 3, I"?*

**Yes, we meant Table 3, I. Thanks.**

*Line 387-407: Your points about deriving  $fSCA$  from camera images may be valid, however, the ALS and ADS evaluations also represent a spatially averaged evaluation at a single time generally closer to mid-season, while the camera evaluation represents a near-point location evaluated continuously including the very beginning and end of the season. Hence the difference in NRMSE could also represent a true difference in the ability of the algorithm to*

*capture snow cover on average versus at a single location. Or how performance varies with HS.*

Though ALS/ADS-derived *fSCA* was only available for 6 points in time, at least one data acquisition date was during late ablation (17 May) and one towards earlier accumulation (26 January). We selected camera images to obtain *fSCA* evaluation data in a much higher temporal resolution than the 6 points in time of the ADS/ALS data sets. Camera images allowed us performing a much more continuous temporal evaluation of modelled *fSCA*- though for three grid cells only.

We agree that the larger temporal resolution of camera-derived *fSCA* reveals larger *fSCA* performance issues due to the spatially and temporally varying performances of modelled *HS*. We already mentioned this in the discussion of the evaluation with Sentinel-derived *fSCA* (Section 5.2.3) where we obtained performance improvements by 10 % when neglecting grid cells with *HS* lower than 5 cm. We now also removed modelled *HS* lower than 5 cm during pre-processing of the model data (Section 3.1). While this improved the overall scatter for the evaluation with Sentinel-2 data considerably, performances with camera-derived *fSCA* improved only slightly. We therefore agree that a difference in the NRMSE could indeed also origin from the fact that for the evaluation with camera-derived *fSCA* we only have three grid cells instead of several hundreds to thousands. This makes it clearly more susceptible to outliers.

A large difference between ALS, ADS-derived *fSCA* and camera-derived *fSCA* are however also the uncertainties related to the product itself. Besides acquisition uncertainties, it matters if a grid cell representative *fSCA* value is derived allowing for 30 % NaN or 90 %. Additionally, a camera "sees" more the steep mountain faces from a slope as opposed to which the flatter parts remain invisible. Unfavorable weather conditions during the longer covered time periods of camera increased product uncertainties.

We extended the discussion on this in Section 5.2.2.

*Code: availability: Does the "depletion curve implementation" differ from the full algorithm?*

No it doesn't. We rephrased that.

#### Technical comments

*The paper contains a lot of non-standard English grammar to the point that it affects reading comprehension. The paper would benefit from a professional copy-editing service.*

Thanks, we carefully went through the manuscript and improved the lan-

guage.

## References

- D. Lawrence, R. Fisher, C. Koven, K. Oleson, S. Swenson, and M. Vertenstein. Technical Description of version 5.0 of the Community Land Model (CLM), 2018. URL [https://www.cesm.ucar.edu/models/cesm2/land/CLM50\\_Tech\\_Note.pdf](https://www.cesm.ucar.edu/models/cesm2/land/CLM50_Tech_Note.pdf). [Online; accessed 31-March-2018].
- S. C. Swenson and D. M. Lawrence. A new fractional snow-covered area parameterization for the community land model and its effect on the surface energy balance. *Journal of Geophysical Research: Atmospheres*, 117(D21), 2012. doi: 10.1029/2012JD018178.
